# Supplementary material
Source: PubMed Central journal article supplement (PMC8663204)
Supplement: NIHMS1654739-supplement-1.pdf [file NIHMS1654739-supplement-1.pdf]

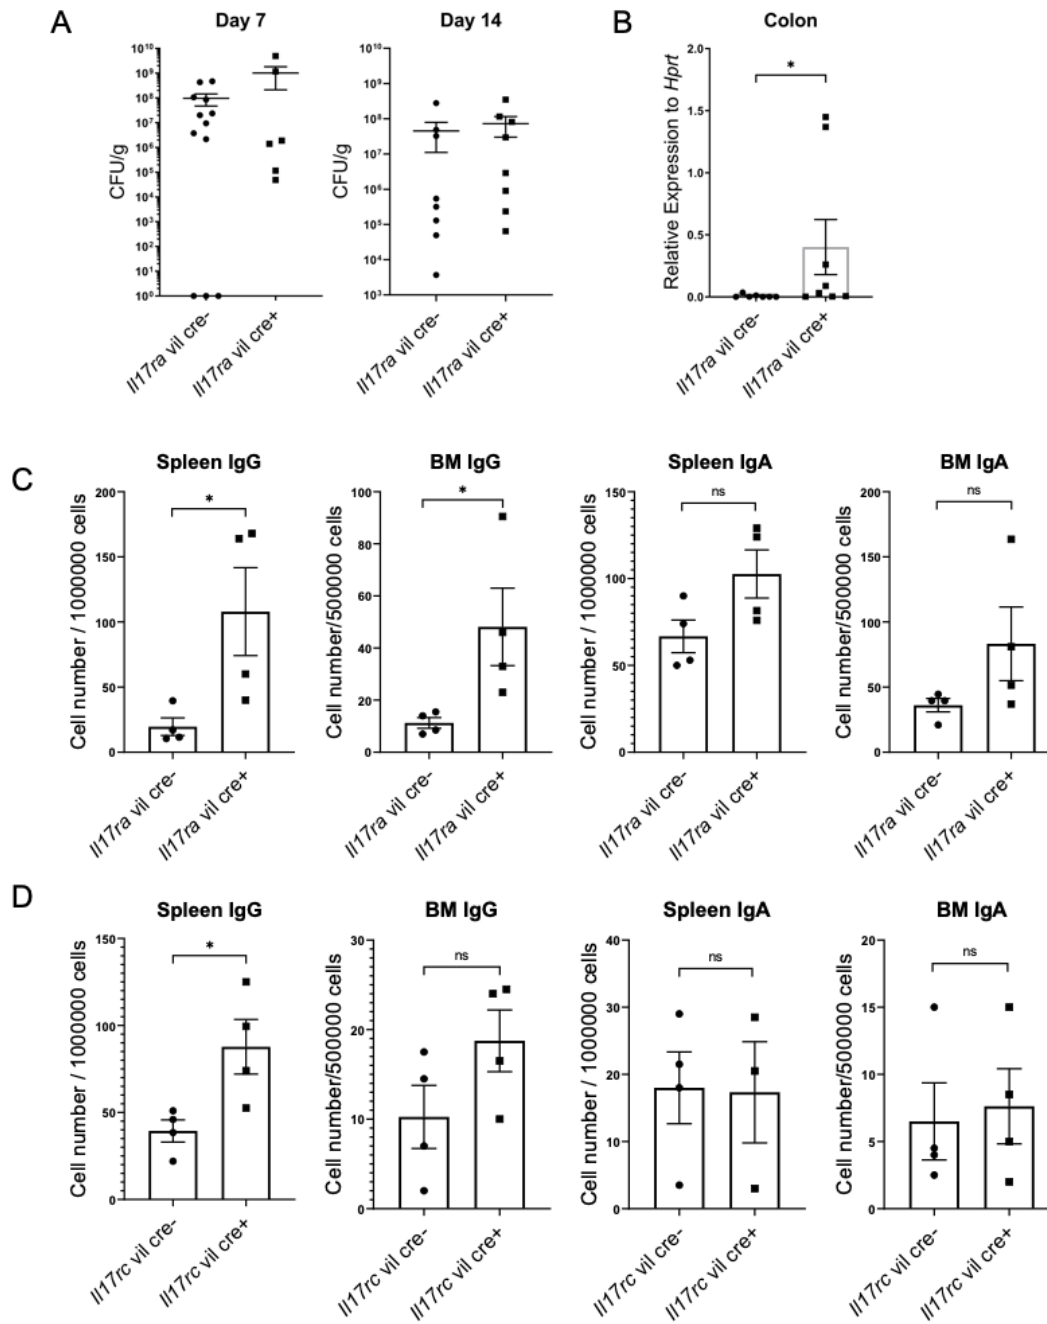

**Figure S1. Extended data on *C. rodentium* infection in intestinal IL-17R deficient mice.** (A) Bacteria burdens at day 7 and day 14 post *C. rodentium* infection in *Il17ra*<sup>fl/fl</sup> villin cre<sup>+</sup> and littermate cre<sup>-</sup> mice (n=8 per group). (B) *C. rodentium* mRNA expression in the colon day 14 post infection in *Il17ra*<sup>fl/fl</sup> villin cre<sup>+</sup> and littermate cre<sup>-</sup> mice (n=8 per group). (C) Anti-*C. rodentium* specific IgA and IgG antibody secreting cells in spleen and bone marrow were measured by Elispot in *Il17ra*<sup>fl/fl</sup> villin cre<sup>+</sup> and littermate cre<sup>-</sup> mice at day 28 post *C. rodentium* infection (n=4 per group). (D) Anti-*C. rodentium* specific IgA and IgG antibody secreting cells in spleen and bone marrow were measured by Elispot in *Il17rc*<sup>fl/fl</sup> villin cre<sup>+</sup> and littermate cre<sup>-</sup> mice at day 28 post *C. rodentium* infection (n=4 per group). (A and B) Significant differences are designated by using 2-tailed Student's t test. \*, p < 0.05. Values are means ± SEM.

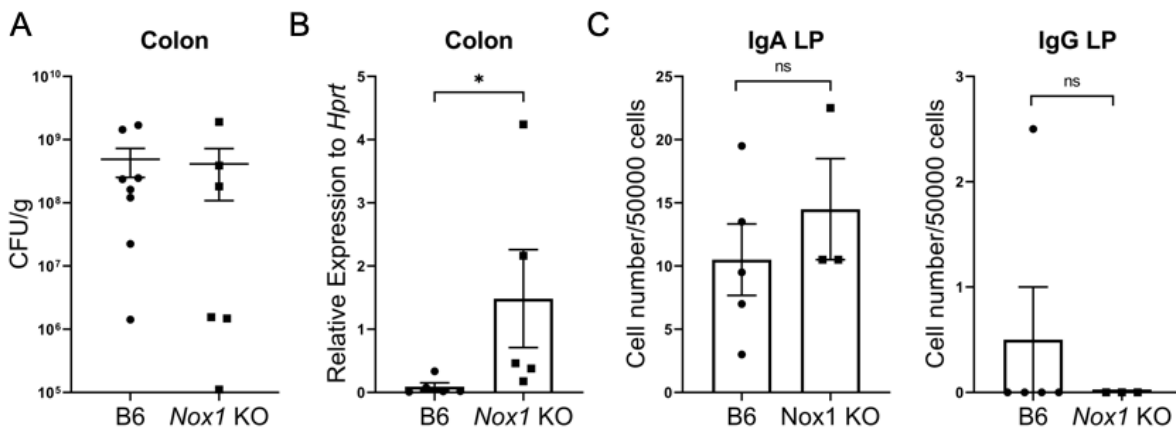

**Figure S2. Nox1 deficiency does not affect generation of *C. rodentium* specific antibodies.**

(A) Bacteria burden at 14 days post *C. rodentium* infection in *Nox1* KO mice and control B6 (n=8 per group). (B) *C. rodentium* mRNA expression in the colons of infected B6 or *Nox1*<sup>-/-</sup> mice (n=8 per group). (C) Anti-*C. rodentium* specific IgA and IgG antibody secreting cells in the colonic lamina propria were measured by Elispot in infected *Nox1* KO mice and control B6 mice, 14 days post-infection (n=4 per group). Significant differences are designated by using 2-tailed Student's t test. ns, non-significant difference; \*, p < 0.05. Values are means ± SEM.

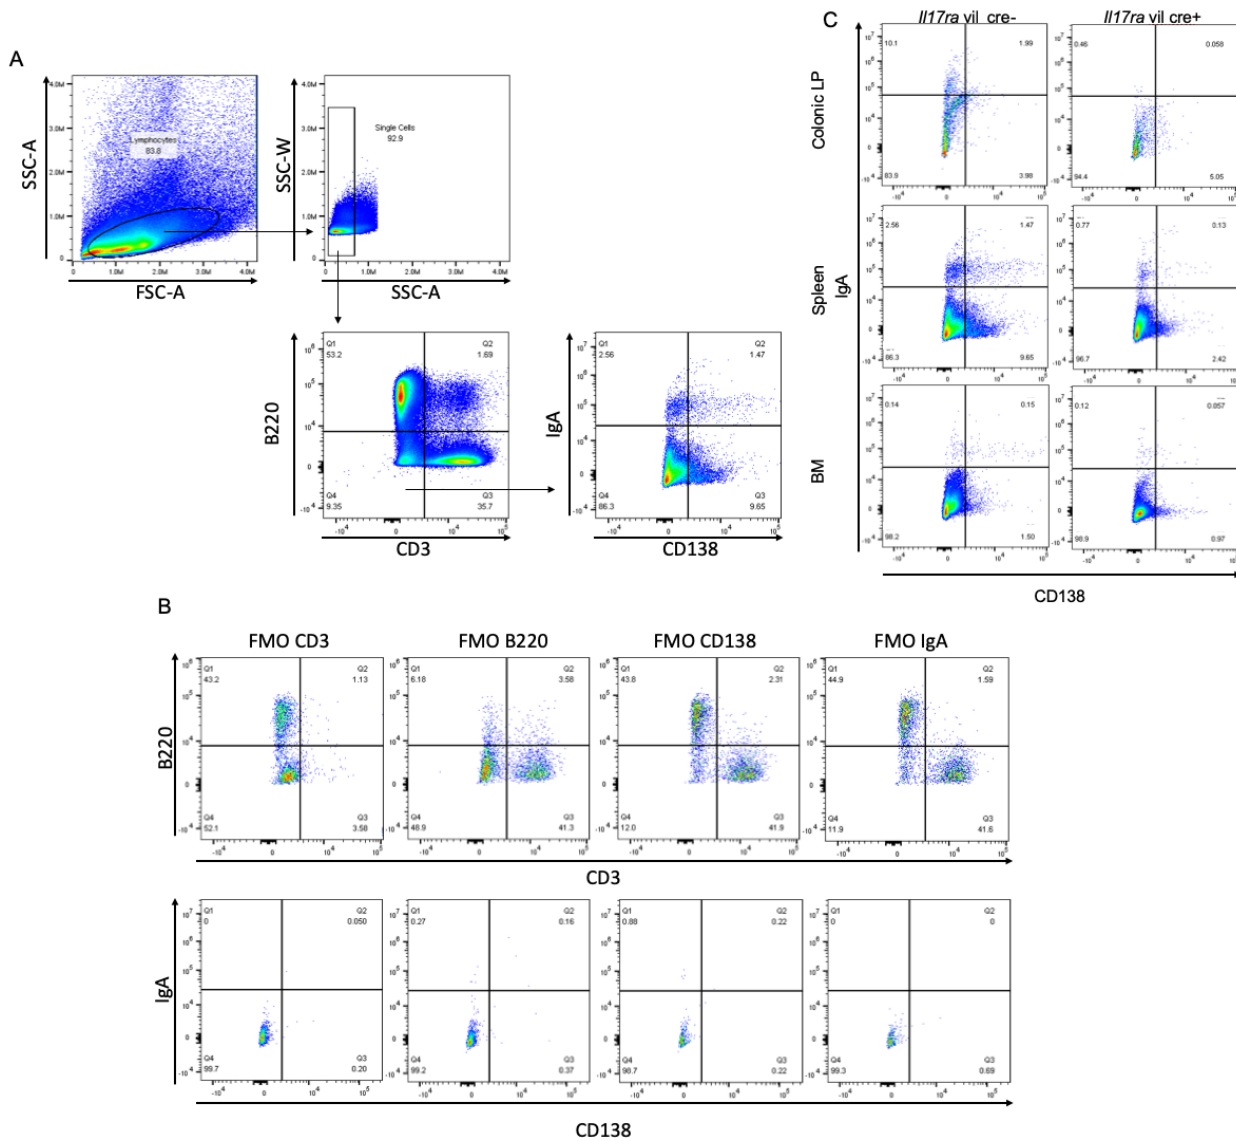

**Figure S3 Plasma cell gating strategy.**

(A) CD138<sup>+</sup> IgA<sup>+</sup> cells in the spleen were gated on CD3<sup>-</sup> and B220<sup>-</sup> by FACS after *Il17ra*<sup>fl/fl</sup> villin cre<sup>-</sup> mice were infected orally with *C. rodentium* for 14 days. (B) The indicated antibody was replaced by isotype control antibody as Fluorescence Minus One (FMO) Control. The cells were collected from spleen after *Il17ra*<sup>fl/fl</sup> villin cre<sup>-</sup> mice were infected orally with *C. rodentium* for 14 days. (C) CD138<sup>+</sup> IgA<sup>+</sup> cells in spleen, BM and lamina propria were gated on CD3<sup>-</sup> and B220<sup>-</sup> by FACS after *Il17ra*<sup>fl/fl</sup> villin cre<sup>-</sup> mice were infected orally with *C. rodentium* for 14 days.
